# Supplementary material
Source: publisher site journal article supplement (https://www.dovepress.com/article/261041)
Supplement: Supplementary file 1 [file get_supplementary_file.php]

**
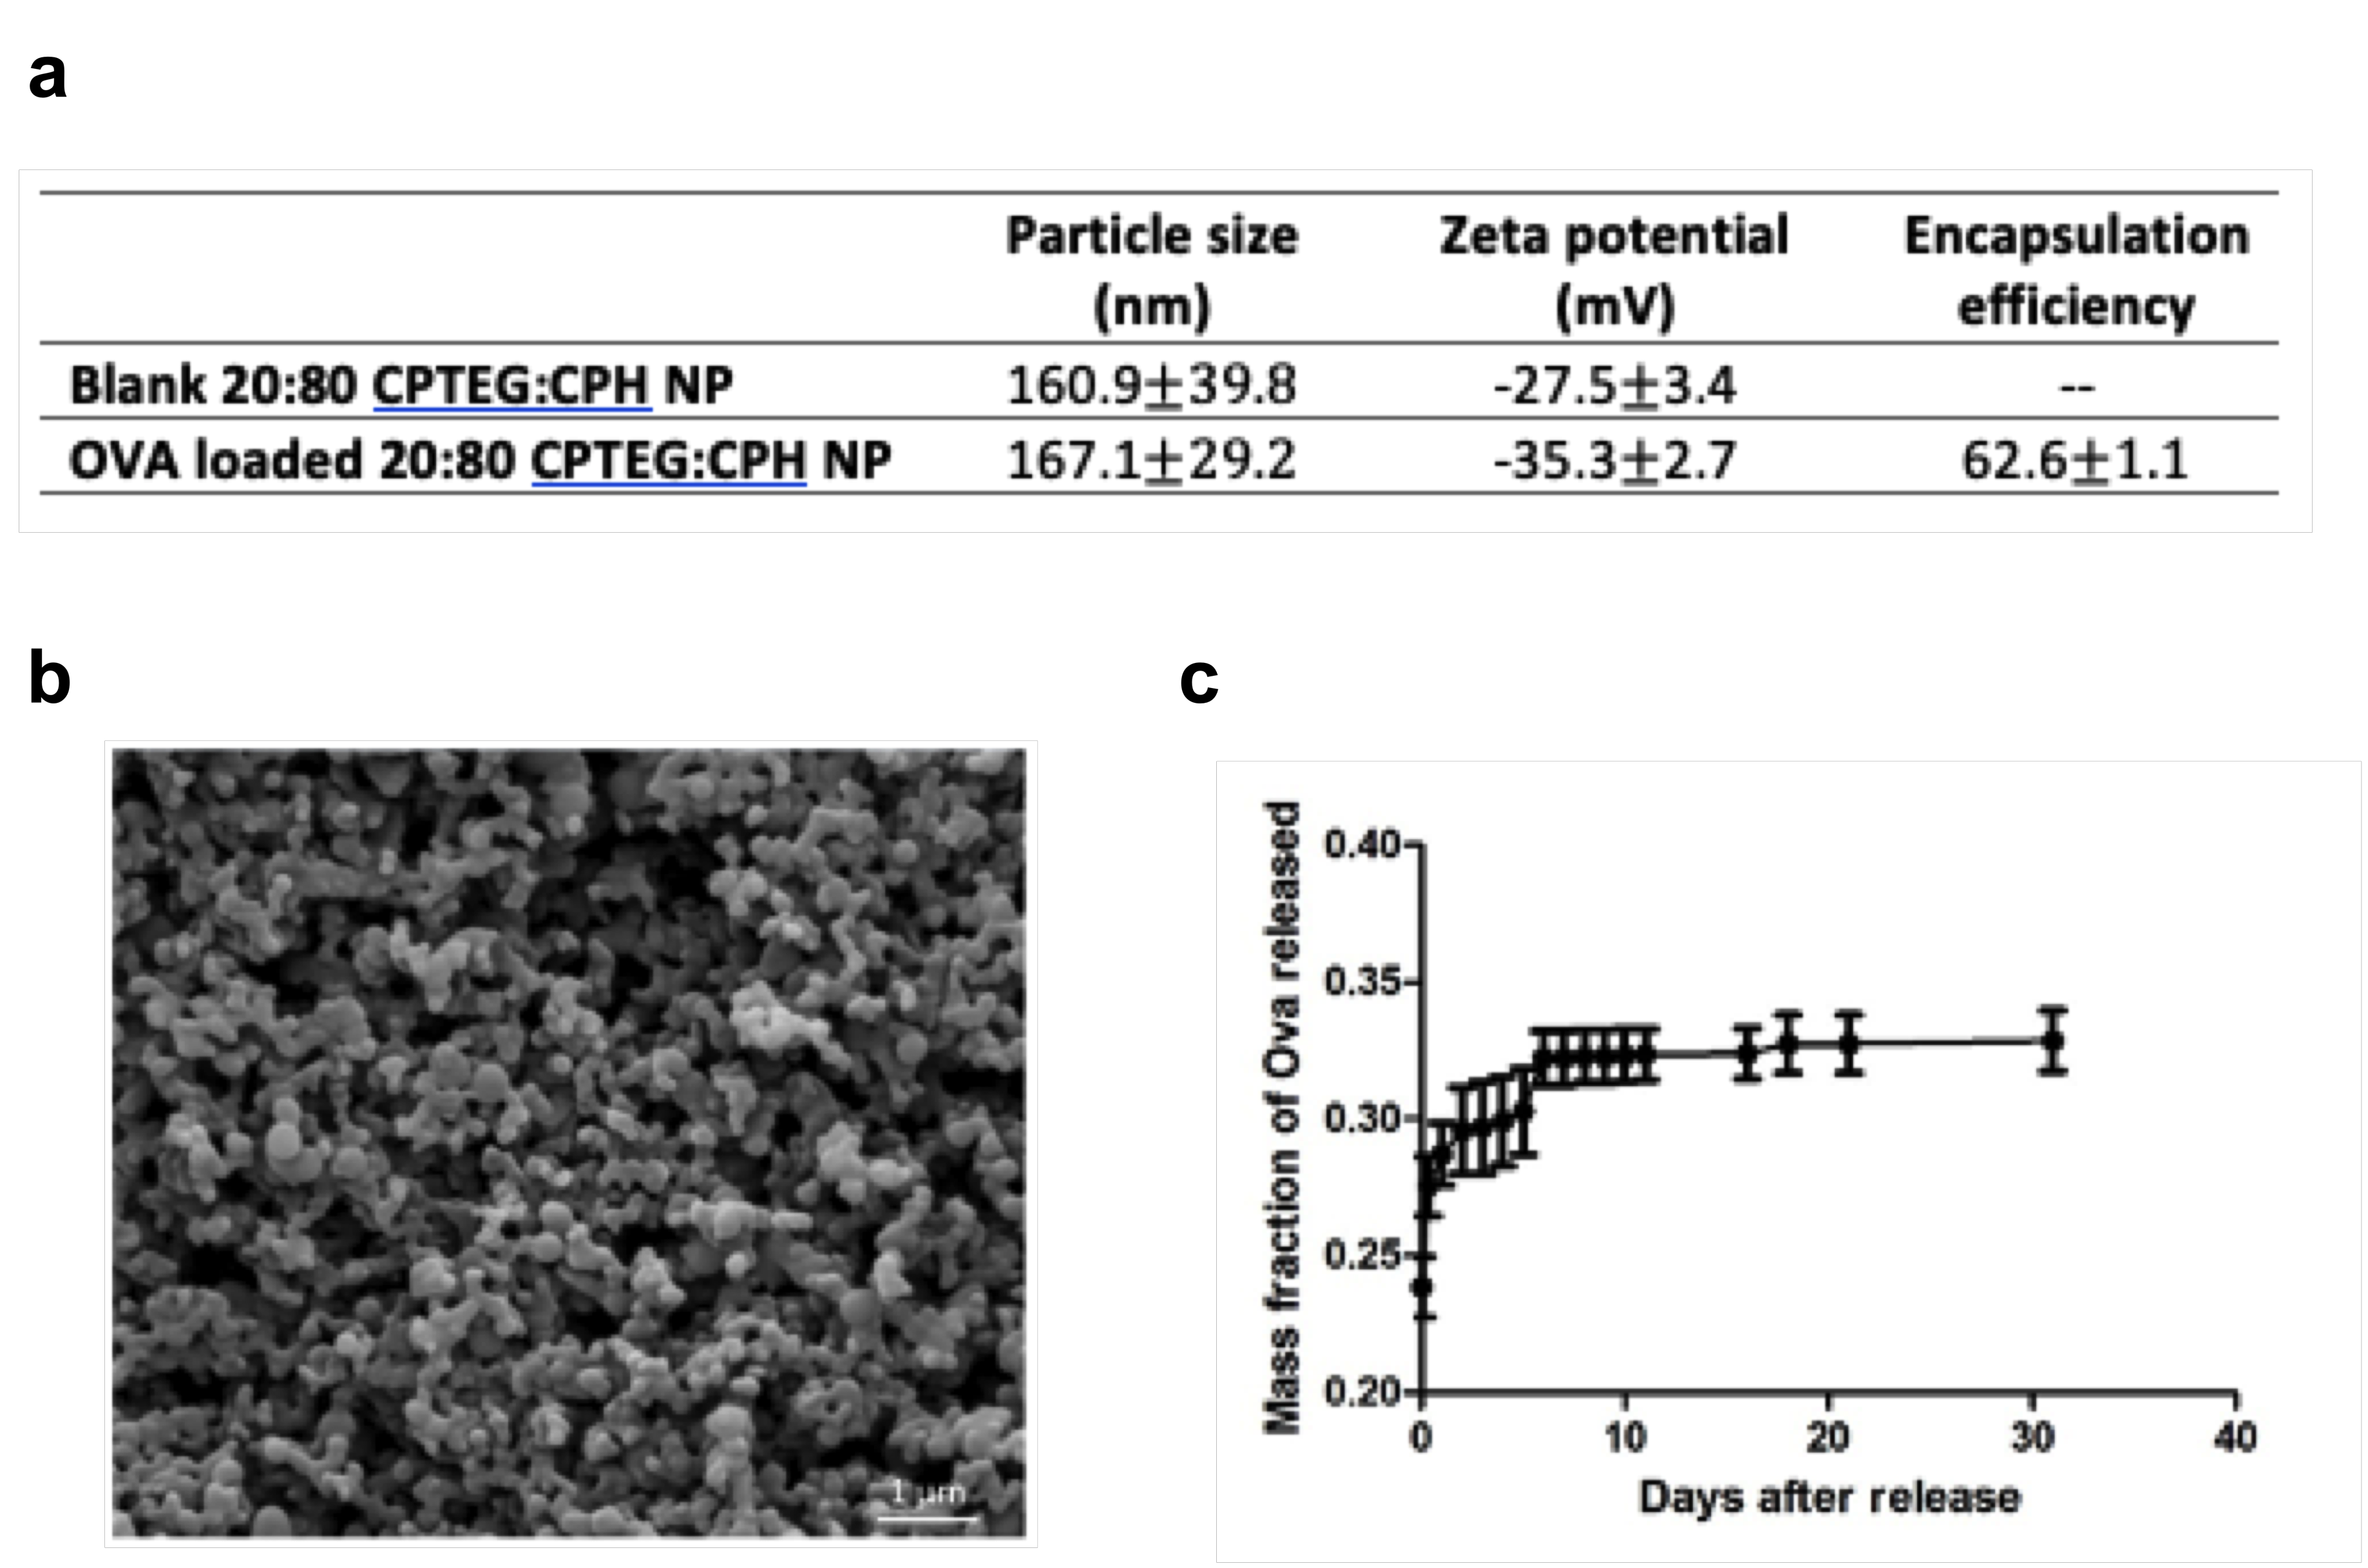
**

**Supplemental Figure 1. Characterization of polyanhydride nanoparticles. (a)** Table of polyanhydride particle properties. **(b)** Scanning electron microscopy image of Ova loaded 20:80 CPTEG:CPH nanoparticles. Scale bar: 1μm. **(c)** Release kinetics of Ova loaded 20:80 CPTEG:CPH nanoparticles collected over 30 days (n=3). Error bars indicate SEM.


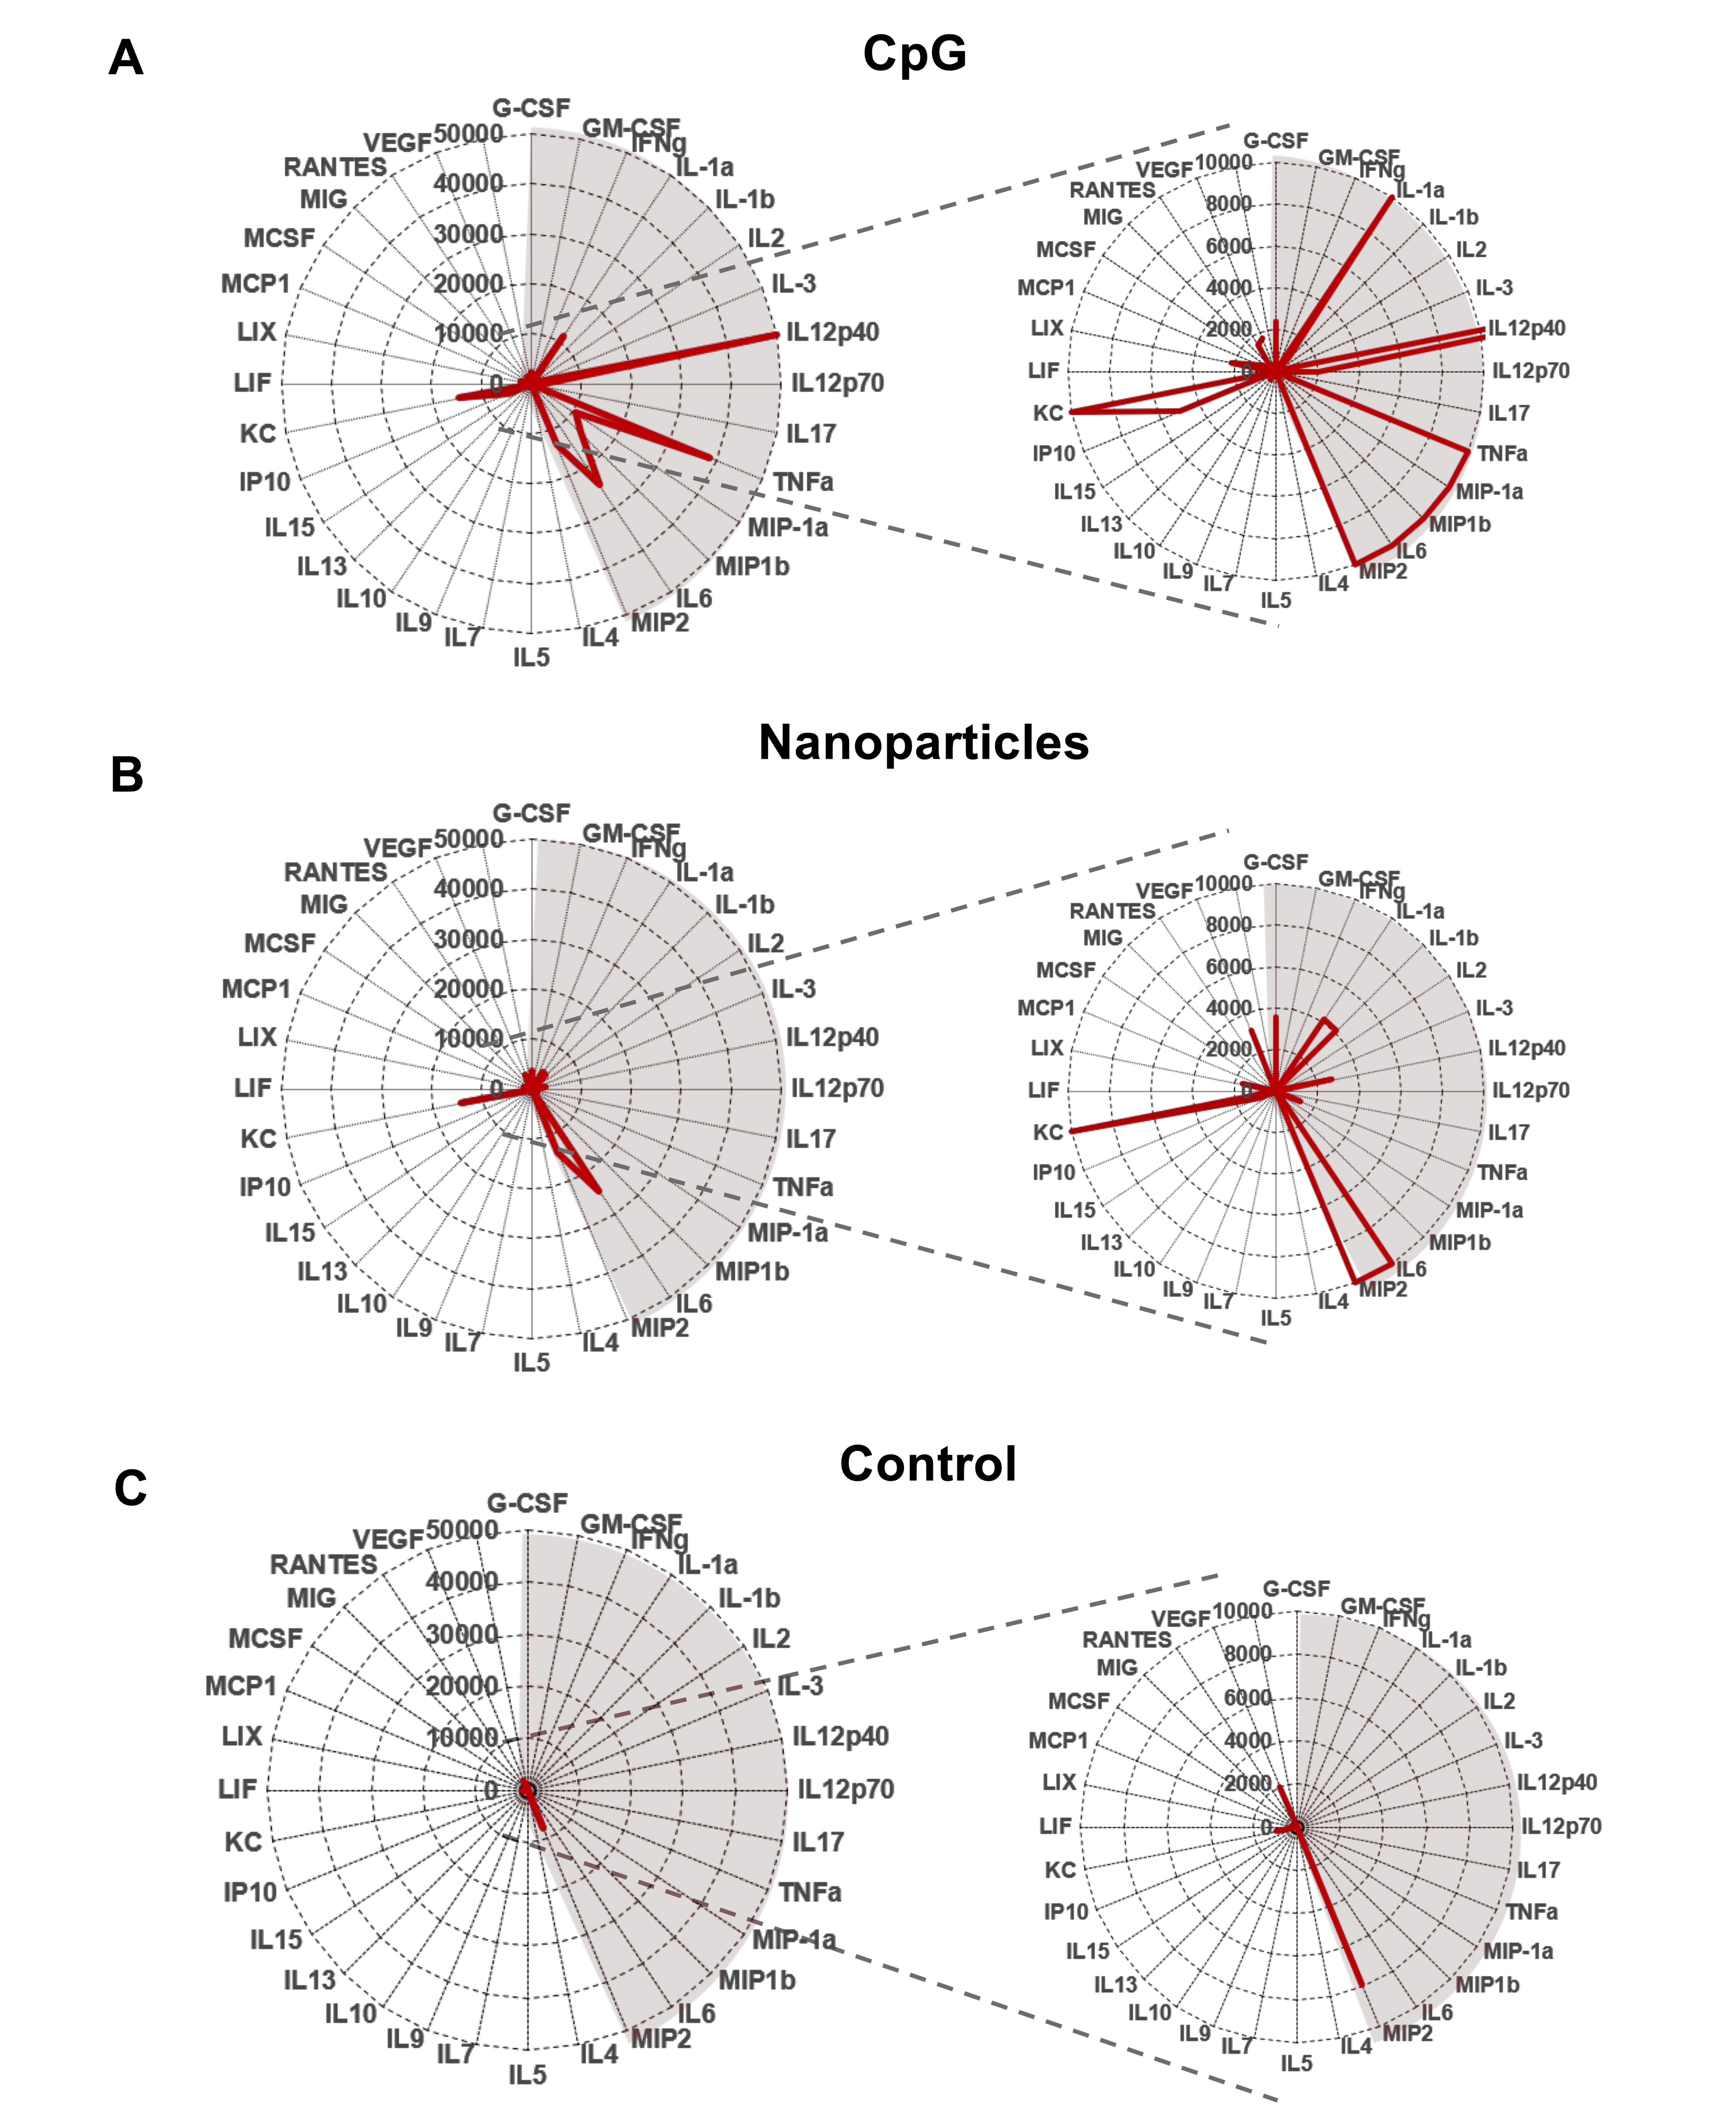


**Supplemental Figure 2. BMDCs stimulated with polyanhydride nanoparticles secrete lower levels of proinflammatory cytokine and chemokines than those stimulated with CpG ODN.** BMDCs generated from naïve BALB/c mice were stimulated for 48 hours with **(a)** CpG ODN plus Ova; **(b)** 20:80 CPTEG:CPH polyanhydride nanoparticles encapsulating Ova (5% w/w); **(c)** or unstimulated control as described in Materials and Methods section. Cytokine concentration in the supernatants were quantified using a 42-plex assay. Numbers denoting concentric circles represent the cytokine concentration (pg/mL). Each cytokine measured in the supernatant is denoted by a solid red line.


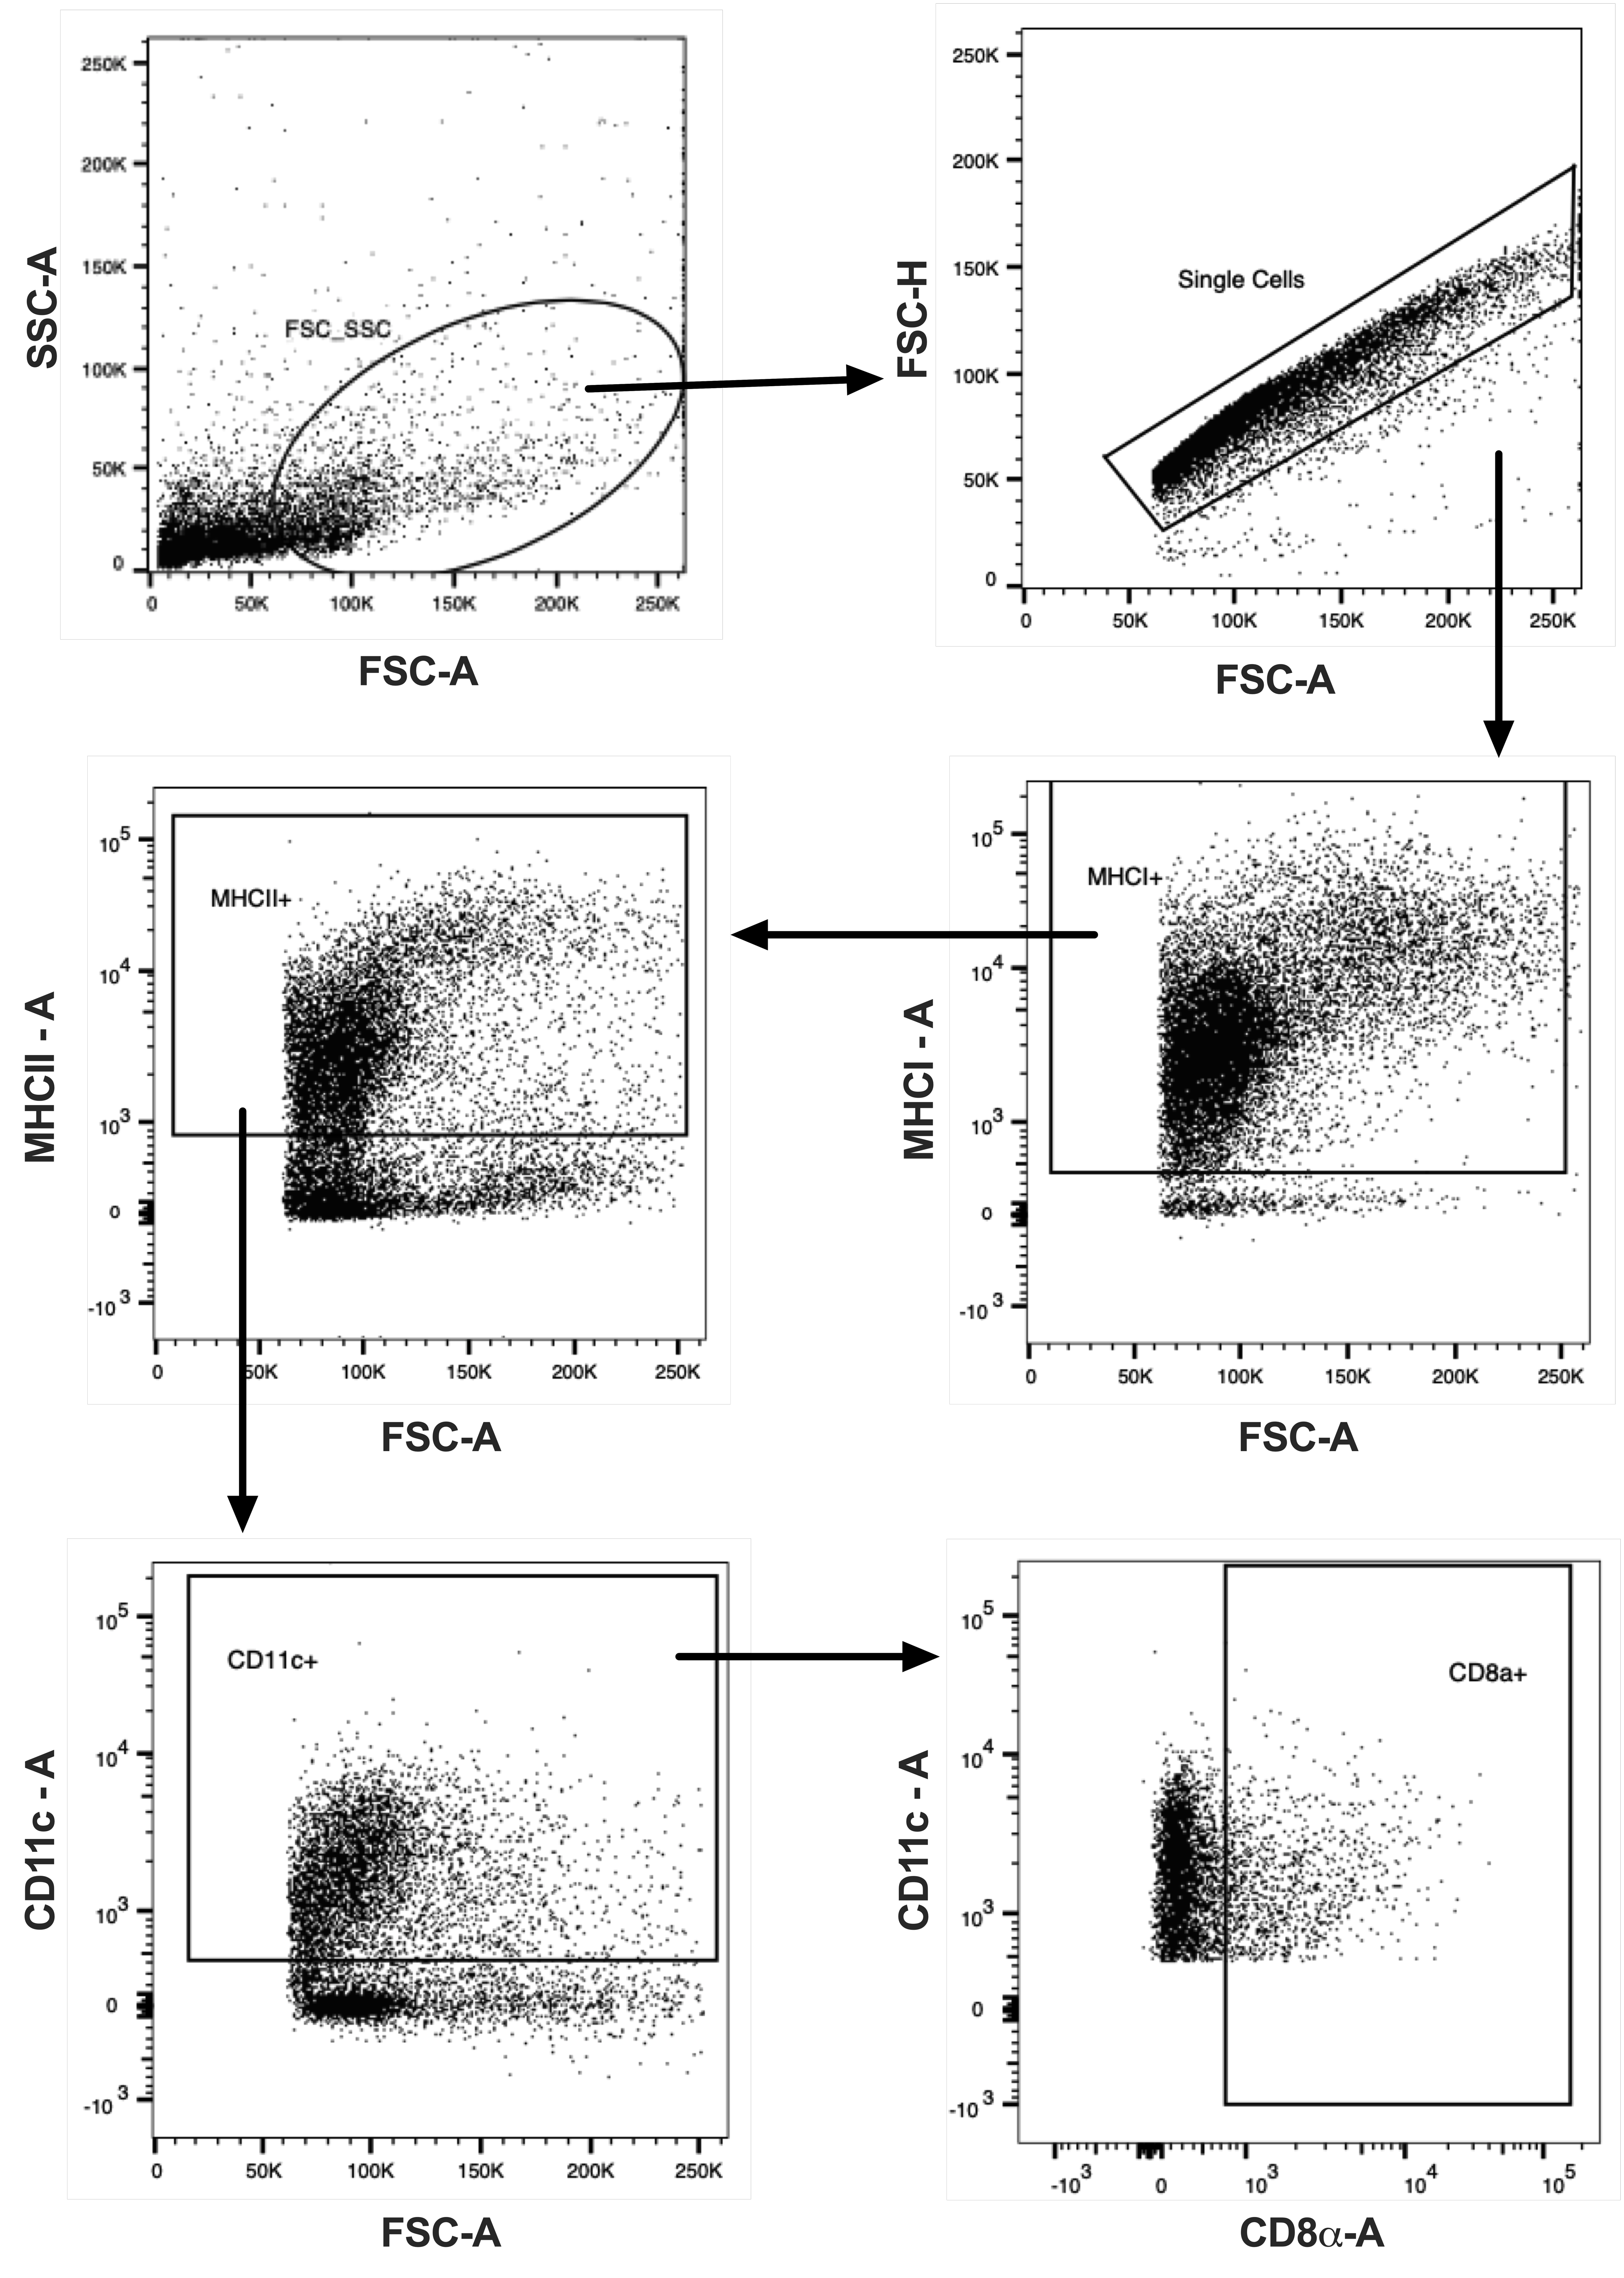


**Supplemental Figure 3. Flow cytometry gating strategy for splenic DC populations.**


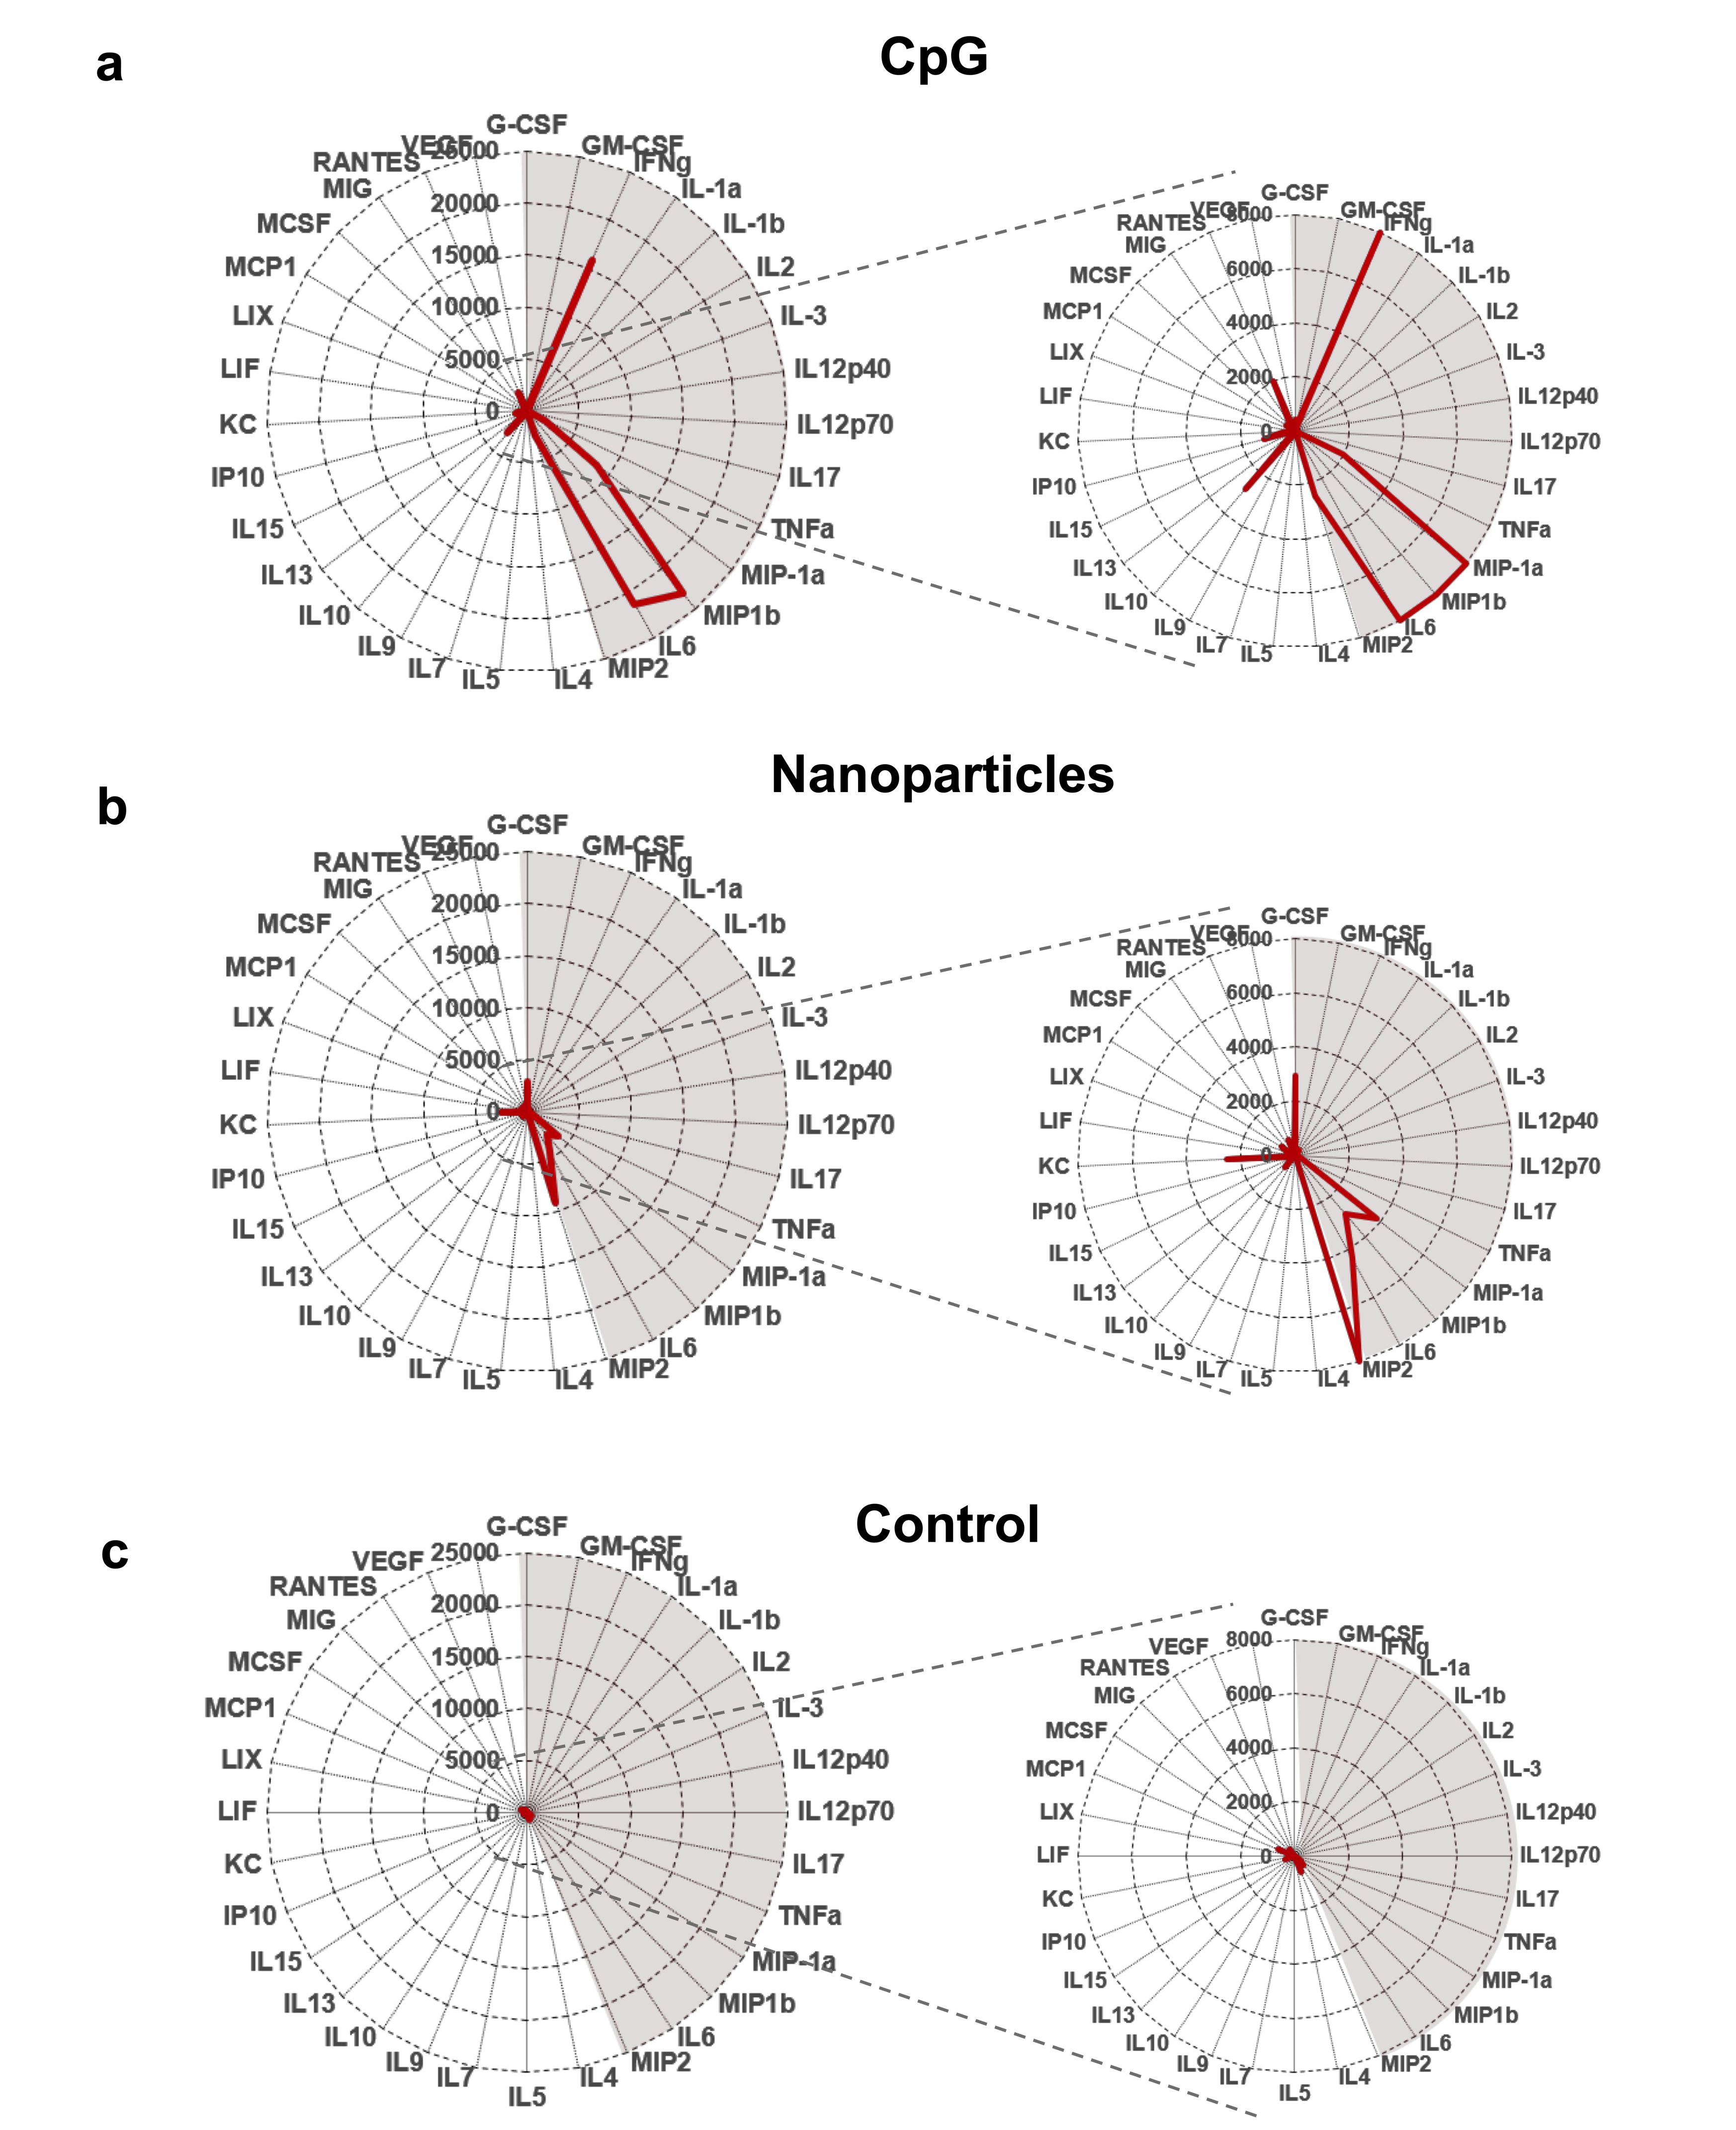


**Supplemental Figure 4. Splenic DCs stimulated with polyanhydride nanoparticles secrete lower levels of proinflammatory cytokine and chemokines than those stimulated with CpG ODN.** Splenic DCs isolated from naïve BALB/c mice were stimulated for 48 hours with **(a)** CpG ODN plus Ova; **(b)** 20:80 CPTEG:CPH polyanhydride nanoparticles encapsulating Ova (5% w/w); **(c)** or unstimulated control as described in Materials and Methods section. Cytokine concentration in the supernatants were quantified using a 42-plex assay. Numbers denoting concentric circles represent the cytokine concentration (pg/mL). Each cytokine measured in the supernatant is denoted by a solid red line.


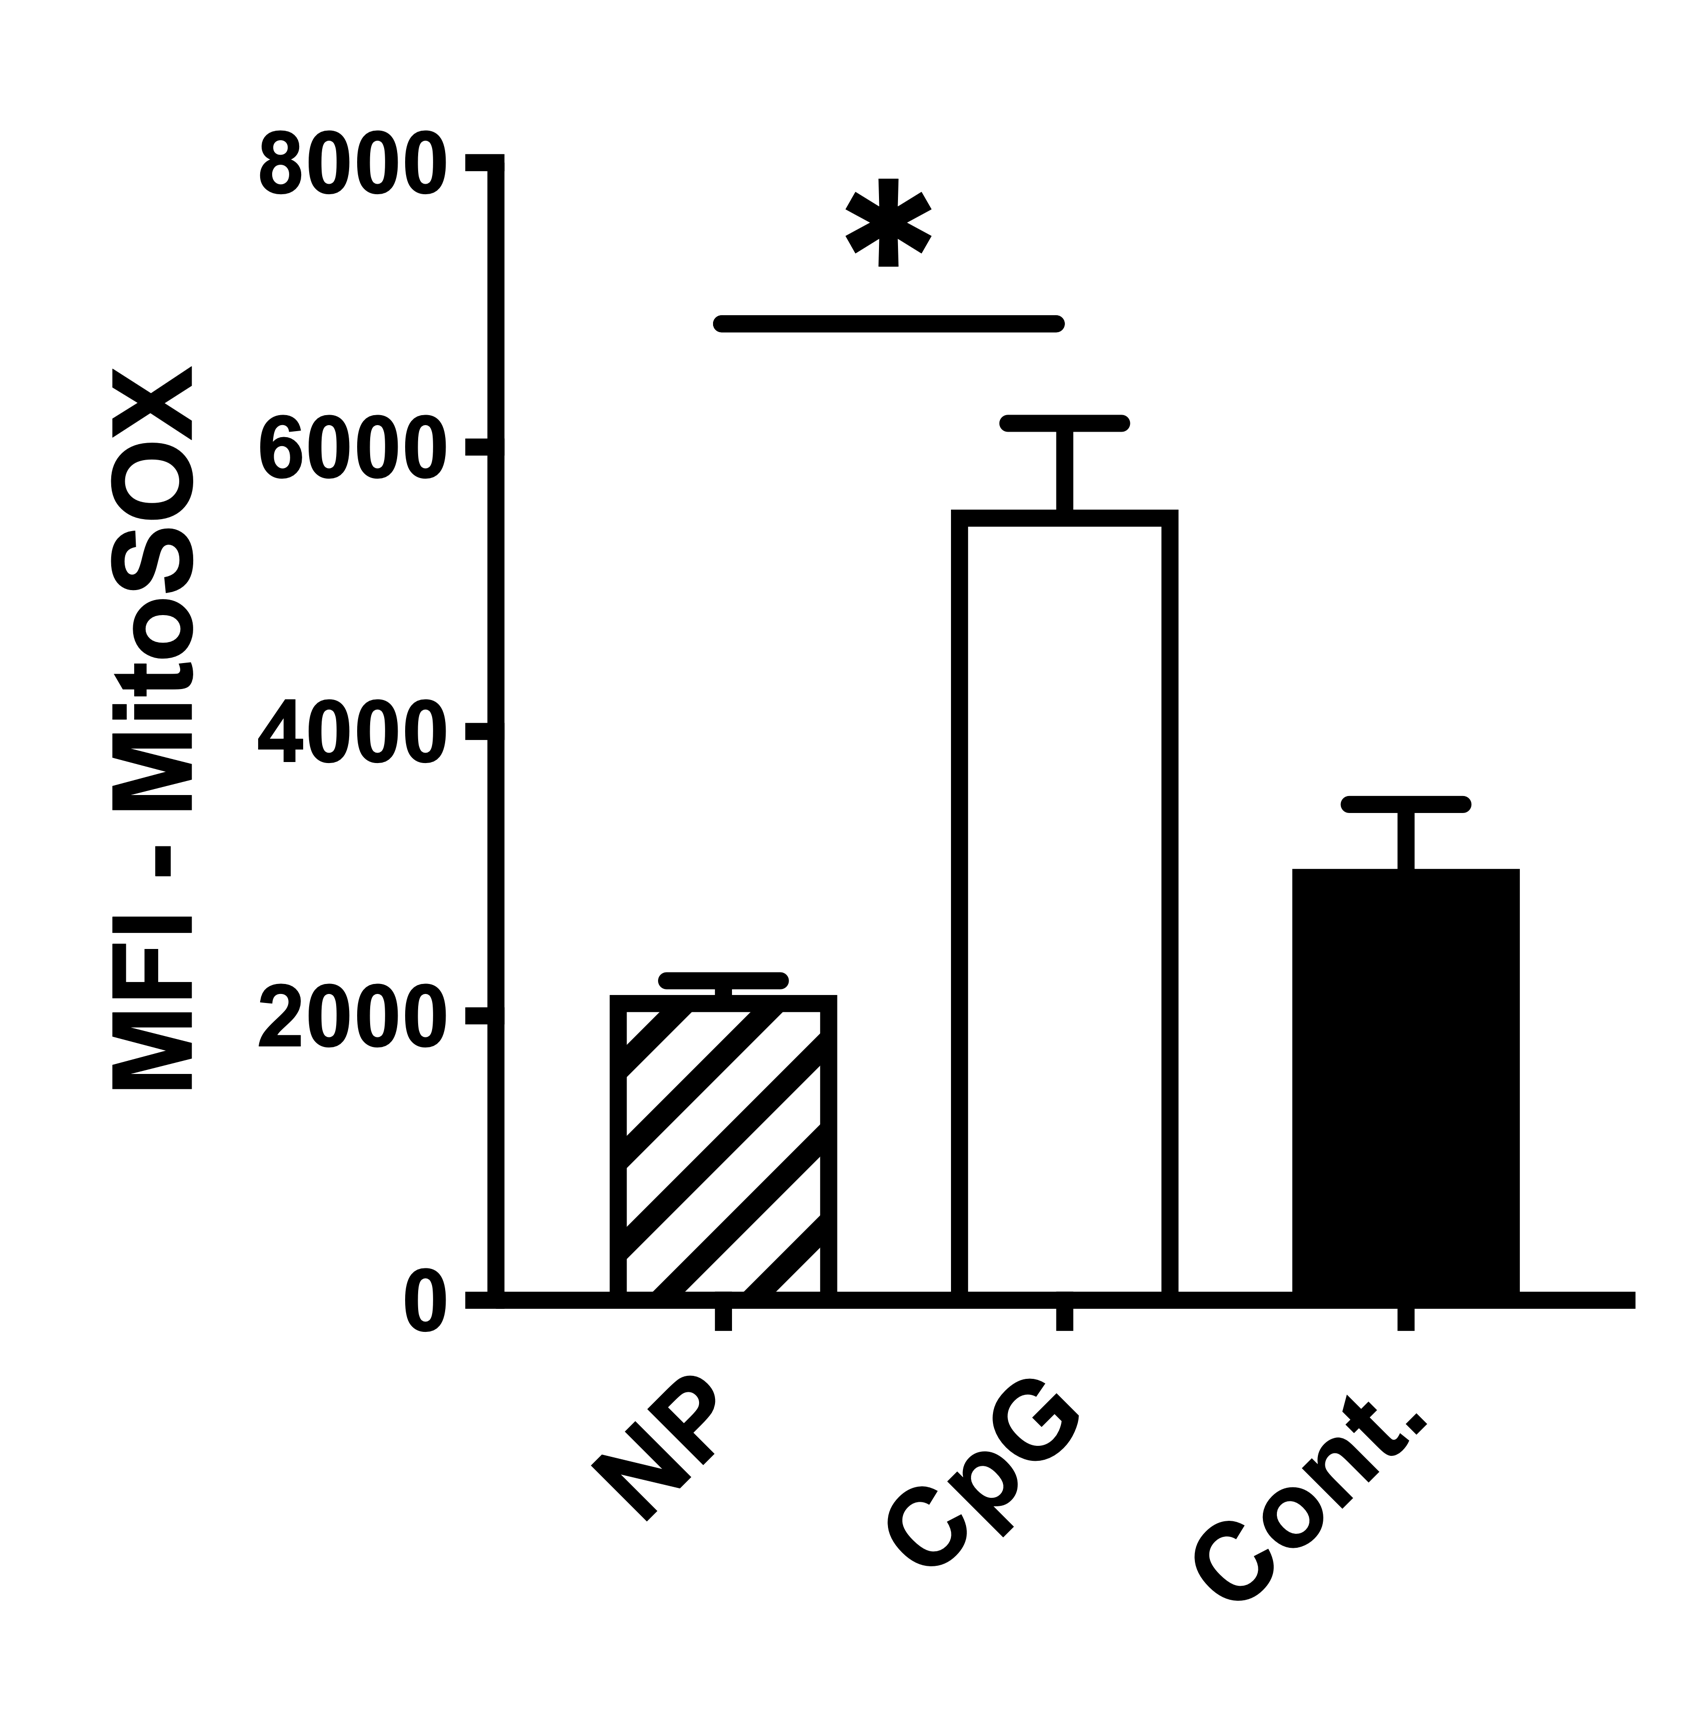


**Supplemental Figure 5 Polyanhydride nanoparticle stimulation of BMDCs does not result in the induction of mitochondrial superoxide.** 20:80 CPTEG:CPH polyanhydride nanoparticles encapsulating Ova (5% w/w) (NP), CpG ODN (CpG) Ova, or unstimulated control (Cont.) were used to stimulate BMDCs as described in Materials and Methods section were assayed for mitochondrial superoxide production via MitoSOX staining and resulting MFI collected via flow cytometry. Significance was determined via one-way ANOVA with a Sidak’s multiple comparison test. Significance is indicated as *p ≤ 0.05. All bars and symbols represent the treatment average ± SEM. Data include two stimulation replicates.


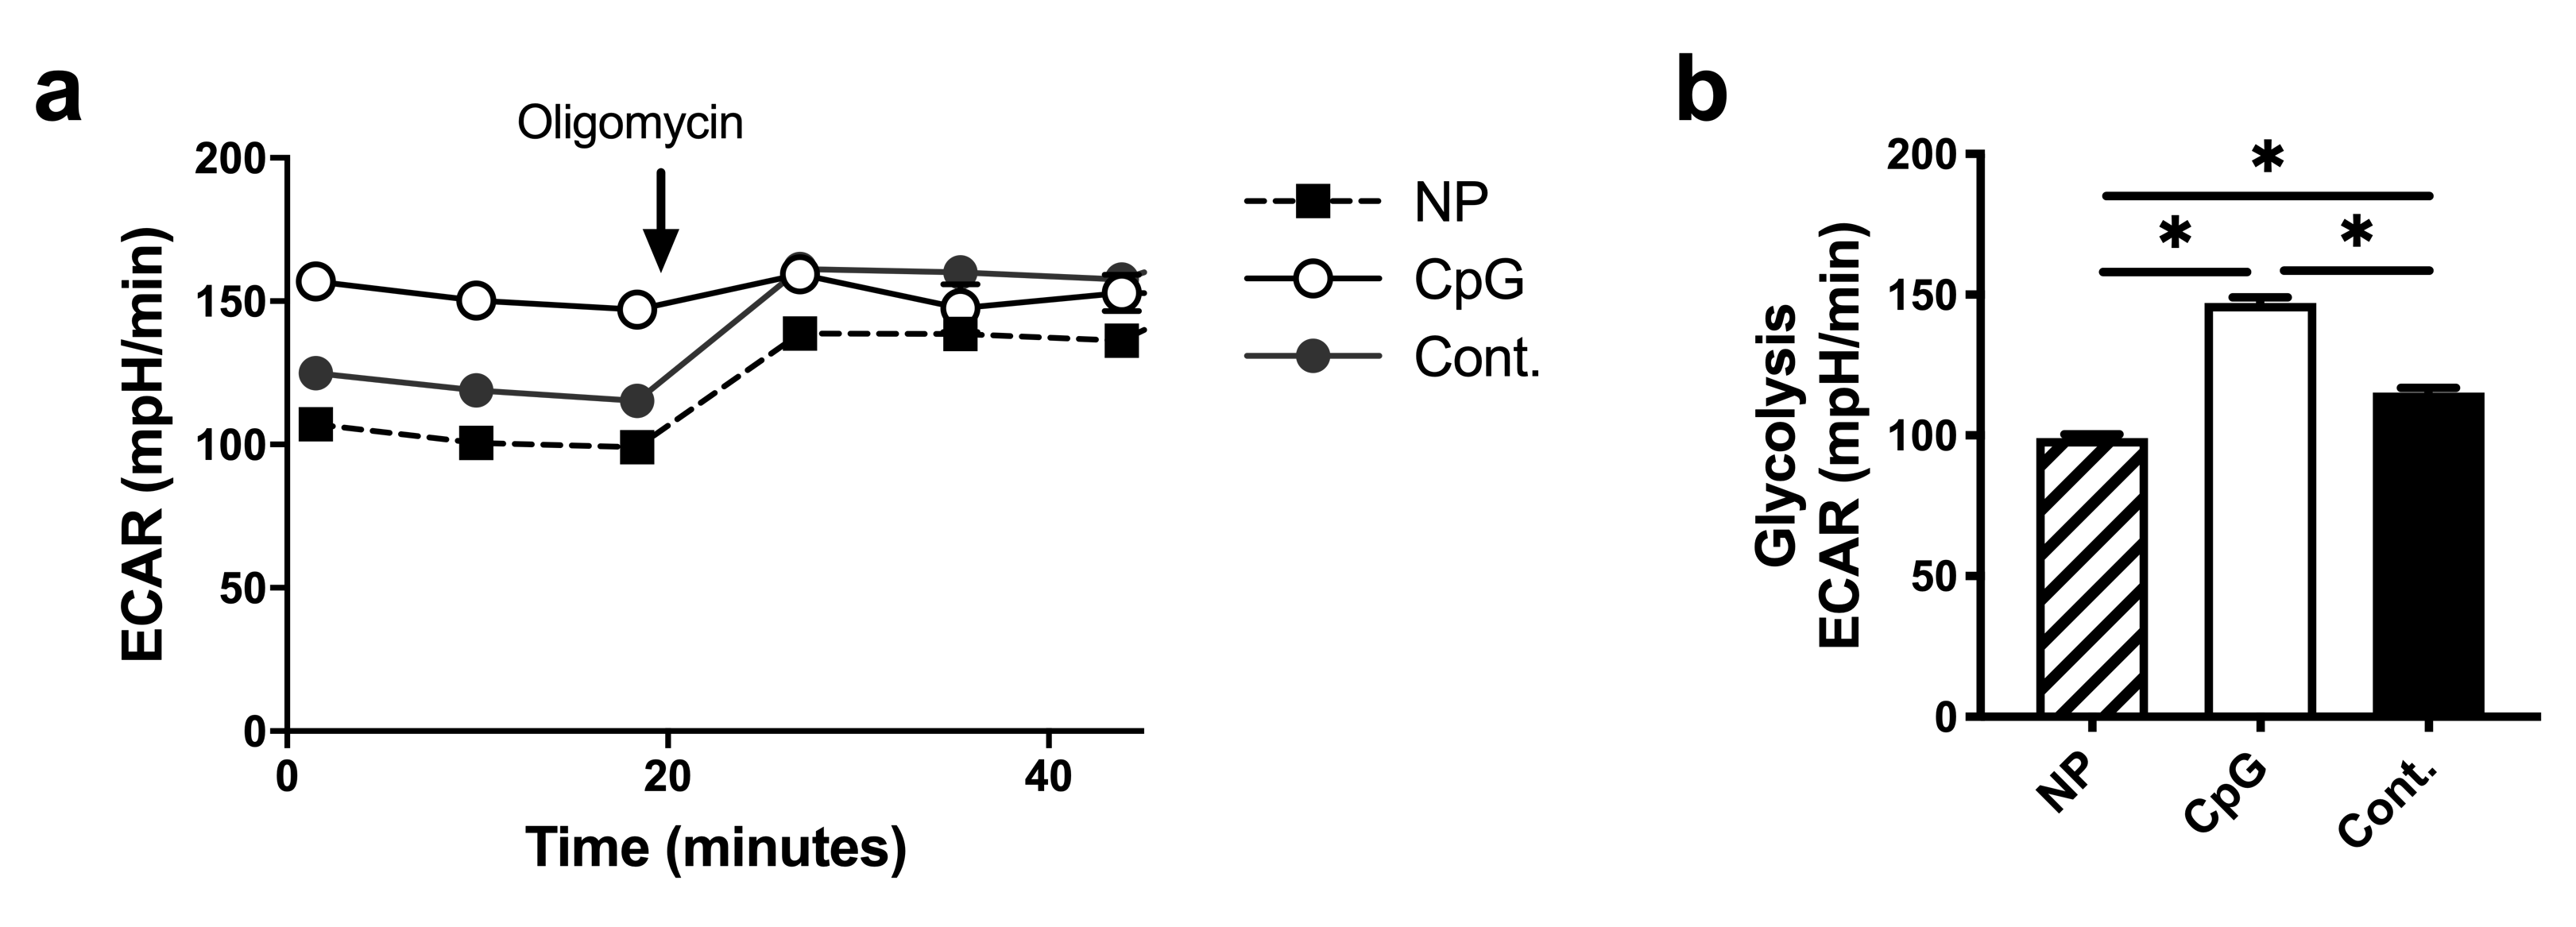


**Supplemental Figure 6. Polyanhydride nanoparticles do not upregulate BMDC glycolytic metabolism in response to stimulation.** BMDCs generated from BALB/c mice were stimulated for 18 h with 20:80 CPTEG:CPH polyanhydride nanoparticles (NP), CpG ODN (CpG), or non-stimulated control (Cont.). Stimulated BMDCs were seeded into 24 well seahorse plates coated with Cell-Tak at a density of 2.5 x 105 cells per well and a mitochondrial stress test (MST) was conducted. **(a)** Kinetic results of a portion of the MST extracellular acidification rate (ECAR) are shown along with **(b)** basal ECAR. Significance between treatments was determined via one-way ANOVA with a Tukey posttest. P value is indicated as *p ≤ 0.05. All bar graphs and symbols represent the treatment average ± SEM.


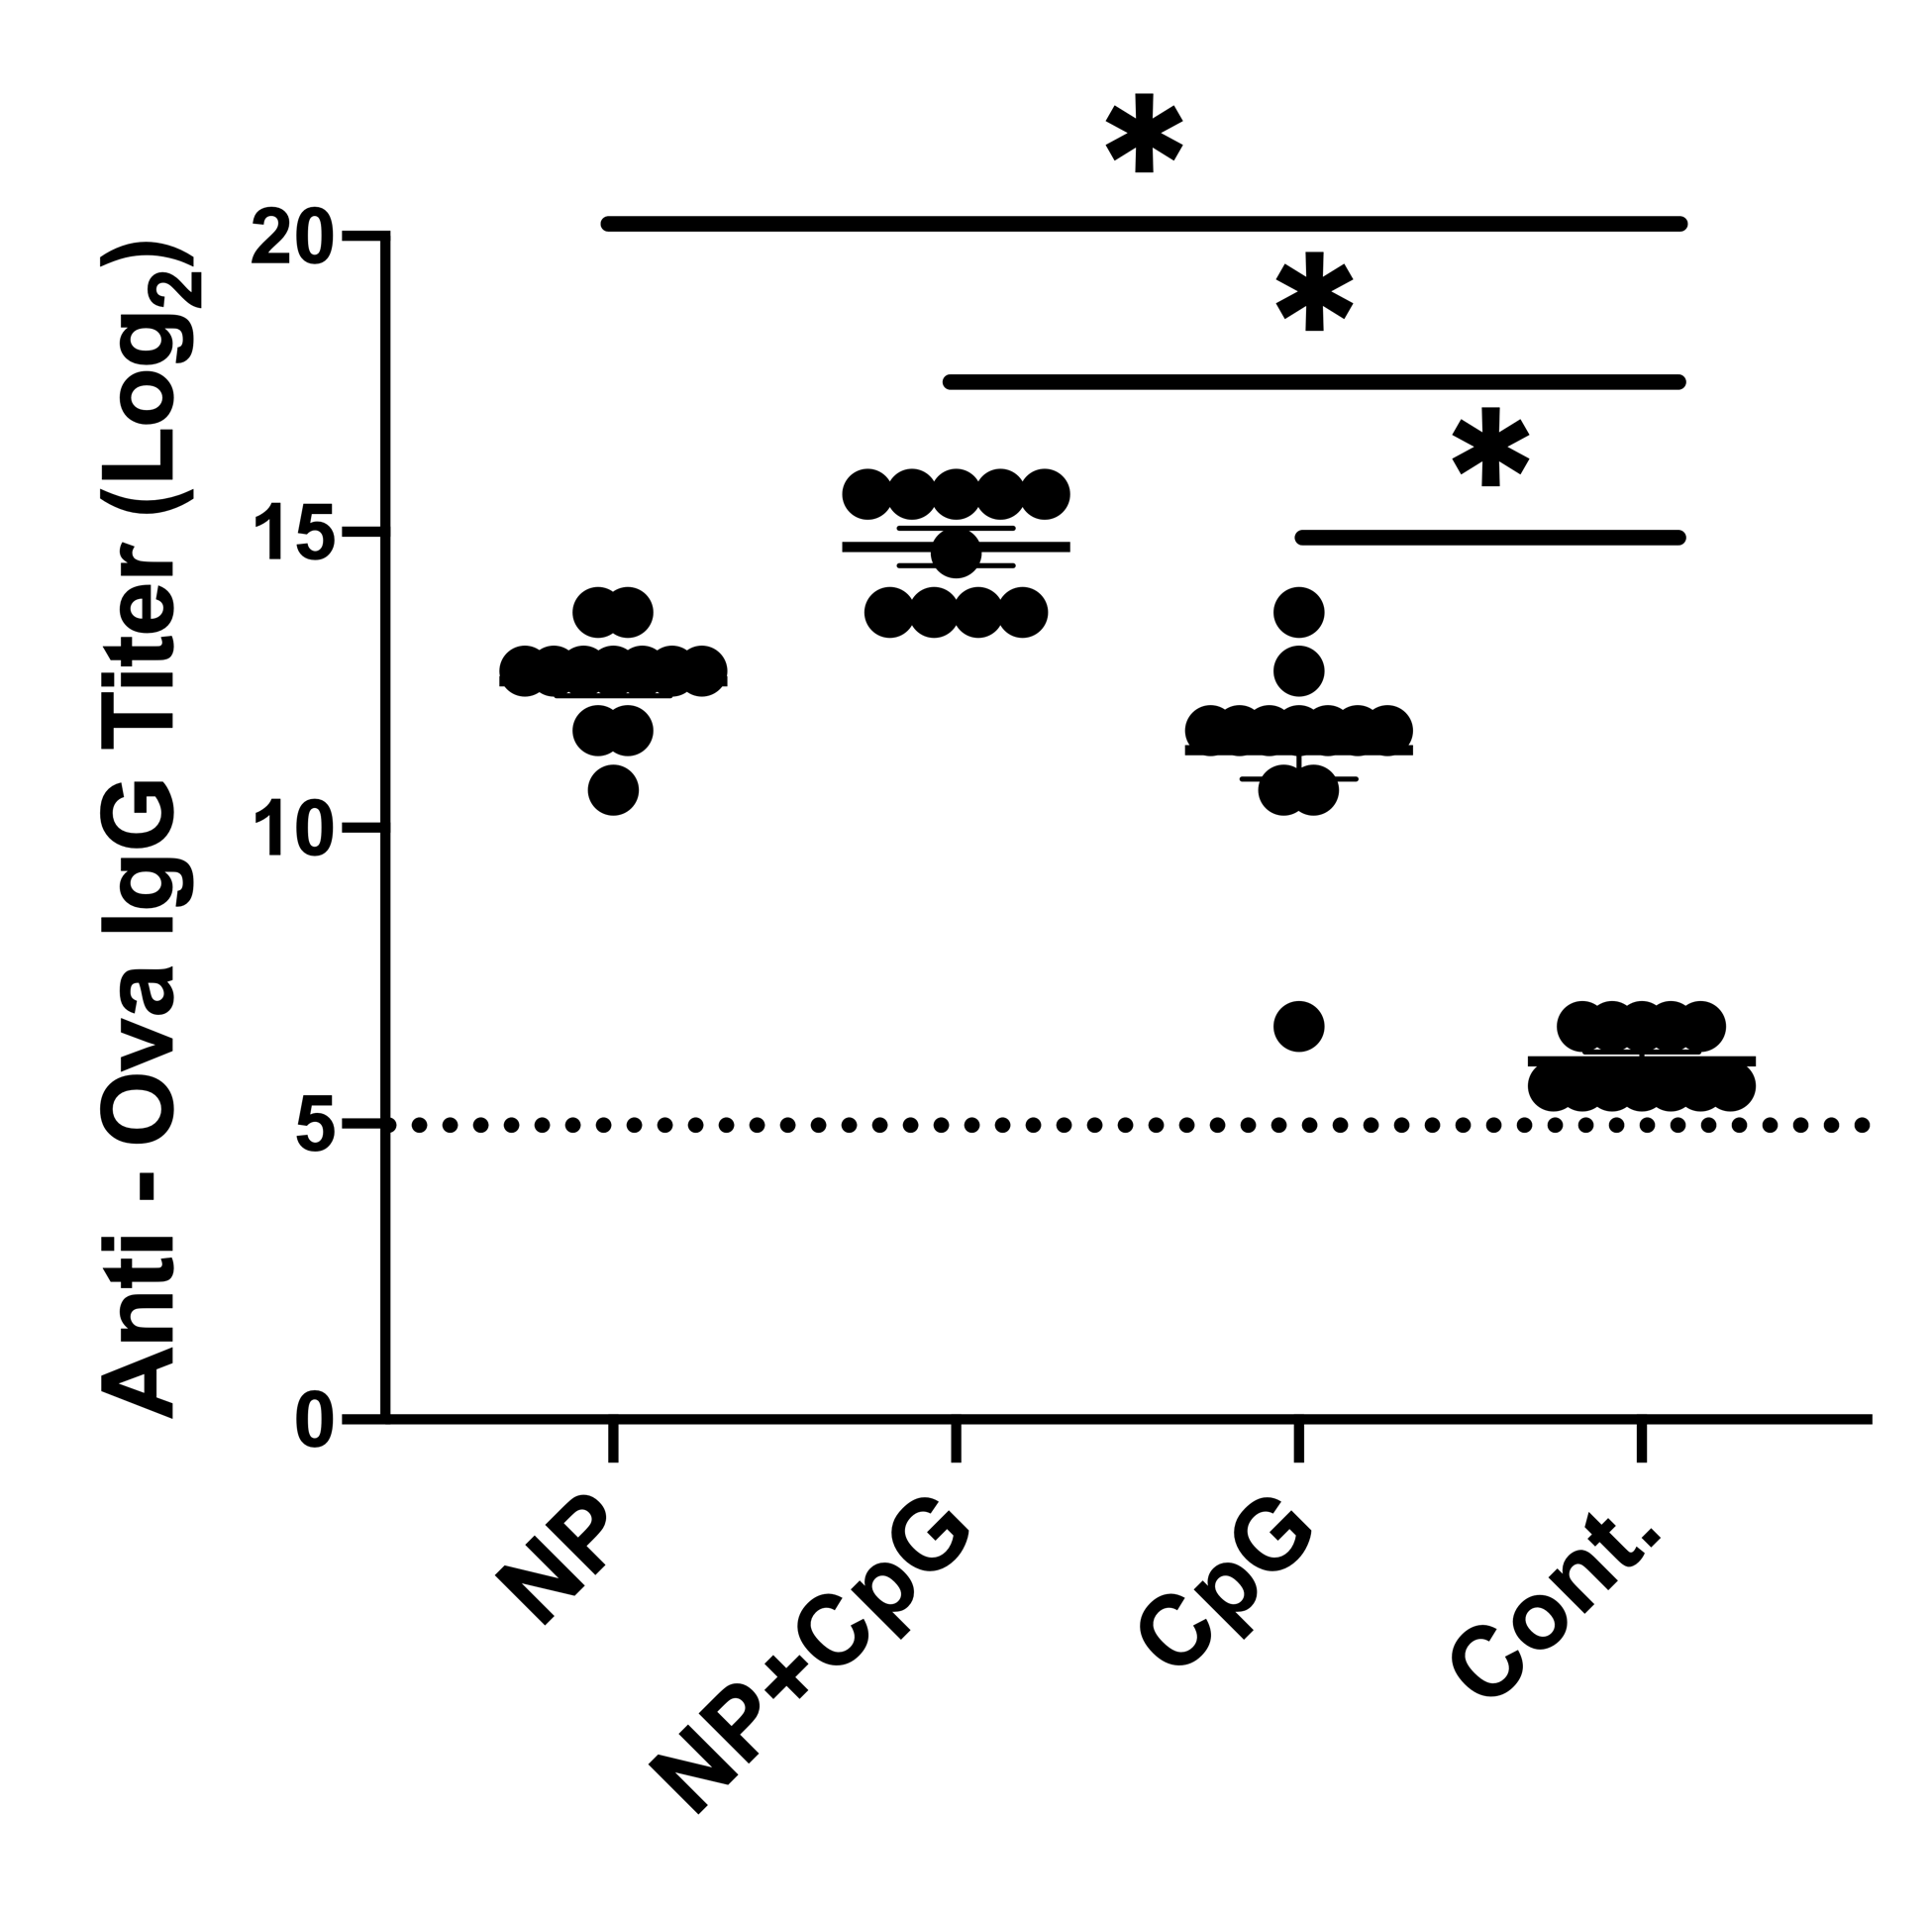


**Supplemental Figure 7. Vaccinated mice generated anti-Ova IgG antibody titers.** C57BL/6 female mice (from Fig. 6) (n=12) were immunized subcutaneously with formulations consisting of 75 g soluble Ova plus 500 g of 20:80 CPTEG:CPH polyanhydride nanoparticles encapsulating 25 g Ova (NP), 100 g soluble Ova adjuvanted with 20 g CpG ODN (CpG), a combination of 75 g soluble Ova plus 500 g of 20:80 CPTEG:CPH polyanhydride nanoparticles encapsulating 25 g Ova adjuvanted with 20 g CpG ODN (NP+CpG), or PBS control. Serum samples were collected 5 weeks post-immunization. Total IgG antibody titers were measure using indirect ELISA. Limit of detection indicated by the dashed line. Significance between each treatment and control was determined via one-way ANOVA with a Dunnett’s posttest. P value is indicated as *p ≤ 0.05. All bar graphs and symbols represent the treatment average ± SEM.
